# Supplementary material
Source: PubMed Central journal article supplement (PMC6339555)
Supplement: AET2-3-86-s001.pdf [file AET2-3-86-s001.pdf]

## Appendix A: Content sections at CanadiEM

| <b>Section</b>                                                                                     | <b>Subsection</b>                                             | <b>Description</b>                                                                     |
|----------------------------------------------------------------------------------------------------|---------------------------------------------------------------|----------------------------------------------------------------------------------------|
| Medical Concepts                                                                                   | Chalk Talks                                                   | Short videos to contextualize preclinical knowledge                                    |
|                                                                                                    | Clinical Questions                                            | Literature based discussion on specific clinical questions                             |
|                                                                                                    | Infographics                                                  | Visual summaries of important journal articles, emphasis on articles published in CJEM |
|                                                                                                    | Knowledge Translation                                         | Critical appraisals of journal articles                                                |
|                                                                                                    | Tiny Tips                                                     | Simple approaches and mnemonics to common clinical presentations                       |
|                                                                                                    | TREKK                                                         | Summaries of Pediatric EM Guidelines                                                   |
| Podcast                                                                                            | CrackCast                                                     | Summarizes and creates a study guide for each chapter of Rosen's Emergency Medicine    |
|                                                                                                    | Physicians as Humans Podcast                                  | Explore social aspects of medicine                                                     |
| Academics<br>(e.g., Educational issues, Education Innovations and Quality Improvement Scholarship) | CAEP Great Evidence in Medical Education Summaries            | Summaries of curated original research articles in medical education                   |
|                                                                                                    | CAEP Feature Educational Innovations                          | Summaries of curated educational innovation articles in medical education              |
|                                                                                                    | Featured Leadership and Organizational Workplace (FLOW) Hacks | Highlights strategies to improve administrative challenges in ED                       |
|                                                                                                    | Mentorship                                                    | Advice around career advancement and personal skill development                        |

|                  |                   |                                                                   |
|------------------|-------------------|-------------------------------------------------------------------|
|                  | Tips for EM Exams | Study aids and advice for the FRCP EM exam                        |
|                  | CaRMS Guide       | Resources for medical students for matching to Emergency Medicine |
| Opinion and Arts | Commentary        | Expert opinions on various subjects                               |
|                  | Counterpoint      | Alternative perspectives to media articles                        |
|                  | Editorial         | Viewpoints on major healthcare issues                             |
|                  | Arts PRN Gallery  | Using art pieces to teach medical content                         |

## Appendix B. Web Technologies used by CanadiEM Editorial Team

| Technology                                  | Use                                                                                                          |
|---------------------------------------------|--------------------------------------------------------------------------------------------------------------|
| Wordpress                                   | Hosts website                                                                                                |
| Slack                                       | Communication platform between editors                                                                       |
| Google Analytics                            | Tracking online viewership analytics, determining online audience behaviour (e.g. time on site, bounce rate) |
| Google Documents                            | Asynchronous document production and collaboration                                                           |
| Google Hangouts                             | Videoconference-based meetings                                                                               |
| Facebook                                    | Engaging with online communities of practice (e.g. FOAM community)                                           |
| Twitter                                     | Engaging with online communities of practice (e.g. FOAM community)                                           |
| Piktochart                                  | Creating infographics                                                                                        |
| iTunes                                      | Download site for podcasts                                                                                   |
| Libsyn                                      | Housing podcasts for distribution, Collecting download analytics                                             |
| Audacity +<br>Auphonic leveling<br>software | Podcast recording, editing and post production engineering                                                   |

Appendix C: Number of CanadiEM contributors, stratified by province in Canada.

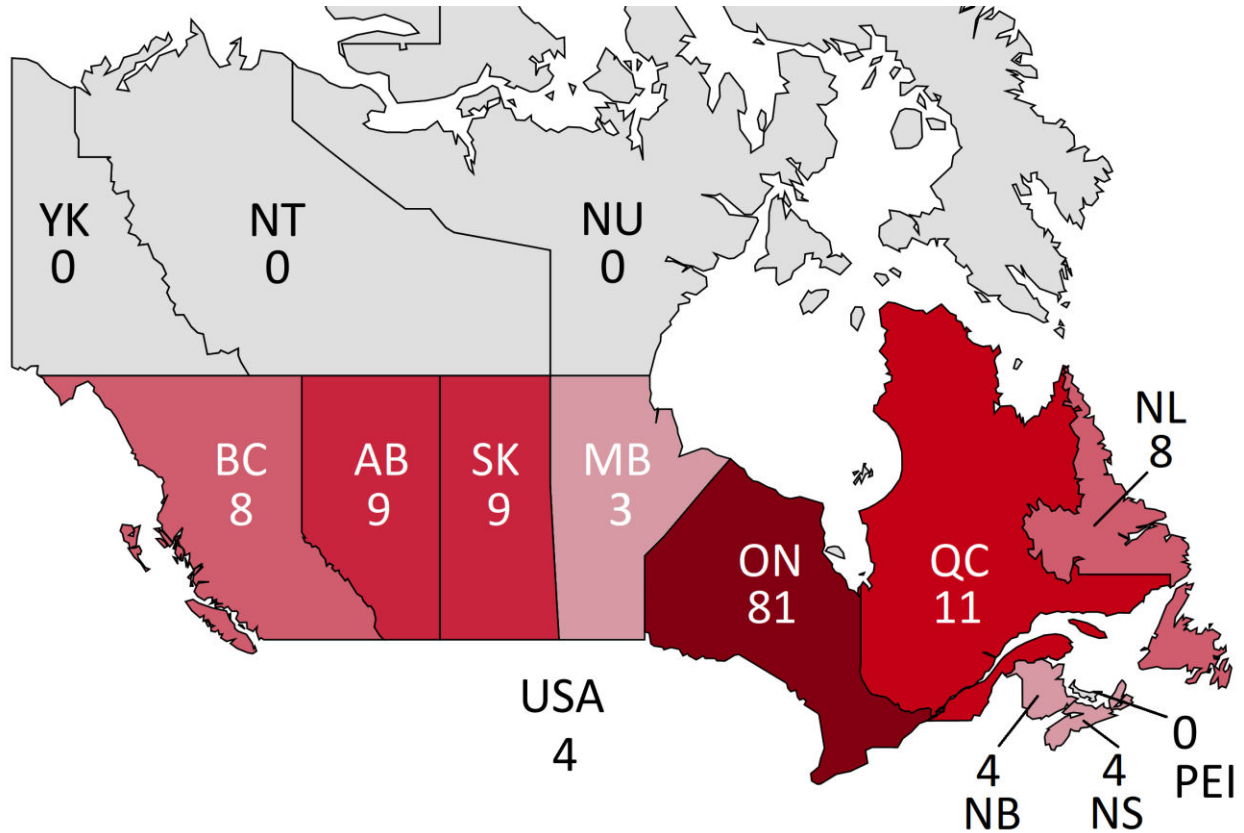

Abbreviations from left to right: *First row:* YK=Yukon, NT=Northwest Territories, NU=Nunavut; *Second Row:* BC=British Columbia, AB=Alberta, SK=Saskatchewan, MB=Manitoba, ON=Ontario; QC=Quebec, NL=Newfoundland and Labrador; *Third Row:* USA=United States of America, NB=New Brunswick, NS=Nova Scotia, PEI=Prince Edward Island.
